# Supplementary material for: Arabidopsis Tetraspanins Facilitate Virus Infection via Membrane-Recognition GCCK/RP Motif and Cysteine Residues
Source: Front Plant Sci. 2022 Mar 3;13:805633. doi: 10.3389/fpls.2022.805633 (PMC8927881; doi:10.3389/fpls.2022.805633)
Supplement: Supplementary file 1 [file Table_1.XLSX]

## Sheet: primers
Supplementary Table 1. The primer pairs used in gene cloning, plasmid construction
Primers	Forward primers (F) and Reverse primers (R)
AttB-TET2	F:5’GGGGACAAGTTTGTACAAAAAAGCAGGCTTTATGGCGTTAGCGAATAACTTAAC 3’
	R:5’GGGGACCACTTTGTACAAGAAAGCTGGGTTGACCCAACCTTGTTTGTATTTGC 3’
AttB-TET3	F:5’GGGGACAAGTTTGTACAAAAAAGCAGGCTTTATGAGAACAAGCAACCATCTCATA 3’
	R:5’GGGGACCACTTTGTACAAGAAAGCTGGGTTAAGATGGAAATGACTAGGATGTG 3’
AttB-TET4	F:5’GGGGACAAGTTTGTACAAAAAAGCAGGCTTTATGAGATCGAGAAGTAACCTTATAGGT 3’
	R:5’GGGGACCACTTTGTACAAGAAAGCTGGGTTTGCATATGTAACATATCCAAAGAAGAA 3’
AttB-TET7	F:5’GGGGACAAGTTTGTACAAAAAAGCAGGCTTTATGGTTCAGTGTAGCAACAATCT 3’
	R: 5’GGGGACCACTTTGTACAAGAAAGCTGGGTTCCAACTGCGTTTCCTGT 3’
AttB-TET8	F:5’GGGGACAAGTTTGTACAAAAAAGCAGGCTTTATGGCTCGTTGTAGCAACA 3’
	R:5’GGGGACCACTTTGTACAAGAAAGCTGGGTTAGGCTTATATCCGTAGGTACG 3’
AttB-TET9	F:5’GGGGACAAGTTTGTACAAAAAAGCAGGCTTTATGGTACGTTTTAGTAACAGTCTTGT 3’
	R:5’GGGGACCACTTTGTACAAGAAAGCTGGGTTAGAATTGTTGAAACCATTGGAAC 3’
AttB-TET3Δmotif1	F:5’GGGGACAAGTTTGTACAAAAAAGCAGGCTTAATGCTCATAGGTTTAGTCAACTTCCTCACT3’
	R:5’GGGGACCACTTTGTACAAGAAAGCTGGGTTAAGATGGAAATGACTAGGATGTGATTTTG 3’
TET3Δmotif2-1	F:5’GGGGACAAGTTTGTACAAAAAAGCAGGCTTAATGAGAACAAGCAACCATCTCA3’
	R: 5’ AGCGAATCCTCGGCTGCTTAACCATATTCCAC 3’
TET3Δmotif2-2	F:5’ GCAGCCGAGGATTCGCTGGAGCTTGTTAC3’
	R:5’GGGGACCACTTTGTACAAGAAAGCTGGGTTAAGATGGAAATGACTAGGATGTGATTTTG 3
TET3Δmotif3	F:5’GGGGACAAGTTTGTACAAAAAAGCAGGCTTAATGAGAACAAGCAACCATCTCA 3’
	R:5’GGGGACCACTTTGTACAAGAAAGCTGGGTTCCTATAAGCTGCATAAGCGATAACG 3’
TET3ΔN terminal	F:5’GGGGACAAGTTTGTACAAAAAAGCAGGCTTAATGATAGGTTTAGTCAACTTCCTCACTTTCC 3’
	R:5’GGGGACCACTTTGTACAAGAAAGCTGGGTTAAGATGGAAATGACTAGGATGTGATTTTG3’
TET3ΔH1-1	F: 5’ATGAGAACAAGCAACCATCTCTTAAGCAGCCGAGCTAACTCC 3’
	R:5’GGGGACCACTTTGTACAAGAAAGCTGGGTTAAGATGGAAATGACTAGGATGTGATTTTG 3’
TET3ΔH1-2	F:5’GGGGACAAGTTTGTACAAAAAAGCAGGCTTAATGAGAACAAGCAACCATCTCTTAAGC 3’
	R:5’CAAAATCACATCCTAGTCATTTCCATCTTAACCCAGCTTTCTTGTACAAAGTGGTCCCC 3’
TET3ΔEC1-1	F:5’GGGGACAAGTTTGTACAAAAAAGCAGGCTTAATGAGAACAAGCAACCATCTCA 3’
	R:5’ GATGAGAGGCCACCATATTCCACCGCCGAG 3’
TET3ΔEC1-2	F:5’ GTGGAATATGGTGGCCTCTCATCGTCATCGG 3’
	R:5’GGGGACCACTTTGTACAAGAAAGCTGGGTTAAGATGGAAATGACTAGGATGTGATTTTG 3’
TET3ΔH2-1	F:5’GGGGACAAGTTTGTACAAAAAAGCAGGCTTAATGAGAACAAGCAACCATCTCA 3’
	R:5’ AACTTGTTACGGTAACATTGAAGGAATCTTAAACAGTCGGTG G 3’
TET3ΔH2-2	F:5’ TTTAAGATTCCTTCAATGTTACCGTAACAAGTTCCTTATGTG 3’
	R:5’GGGGACCACTTTGTACAAGAAAGCTGGGTTAAGATGGAAATGACTAGGATGTGATTTTG 3’
TET3ΔICL-1	F:5’GGGGACAAGTTTGTACAAAAAAGCAGGCTTAATGAGAACAAGCAACCATCTCA 3’
	R:5’ GCCACATAAGAGCTCCAGCGAATCCAG 3’
TET3ΔICL-2	F:5’ CGCTGGAGCTCTTATGTGGCTATACCTAGTAGTCATGC 3’
	R:5’GGGGACCACTTTGTACAAGAAAGCTGGGTTAAGATGGAAATGACTAGGATGTGATTTTG 3’
TET3ΔH3-1	F:5’GGGGACAAGTTTGTACAAAAAAGCAGGCTTAATGAGAACAAGCAACCATCTCA 3’
	R:5’ CGGATCCTTTATCGAACTTGTTACGGTAACAAGCTCCA 3’
TET3ΔH3-2	F:5’ CCGTAACAAGTTCGATAAAGGATCCGGTCGAACCG 3’
	R:5’GGGGACCACTTTGTACAAGAAAGCTGGGTTAAGATGGAAATGACTAGGATGTGATTTTG 3’
TET3ΔEC2-1	F:5’GGGGACAAGTTTGTACAAAAAAGCAGGCTTAATGAGAACAAGCAACCATCTCA 3’
	R:5’ TGATCACCGATGTAACCGCGTAAGCGAAG 3’
TET3ΔEC2-2	F:5’ CGCGGTTACATCGGTGATCAACATTGTGGTACT 3’
	R:5’GGGGACCACTTTGTACAAGAAAGCTGGGTTAAGATGGAAATGACTAGGATGTGATTTTG G 3’
TET3ΔH4-1	F:5’GGGGACAAGTTTGTACAAAAAAGCAGGCTTAATGAGAACAAGCAACCATCTCA 3’
	R:5’ CTCTTGACATTCCTATATACTTTTCTCCAACTCTTCTTCAAACTCC 3’
TET3ΔH4-2	F:5’ AGAGTTGGAGAAAAGTATATAGGAATGTCAAGAGGATCGATAACG3’
	R:5’GGGGACCACTTTGTACAAGAAAGCTGGGTTAAGATGGAAATGACTAGGATGTGATTTTG 3’
TET3ΔC terminal	F:5’GGGGACAAGTTTGTACAAAAAAGCAGGCTTAATGAGAACAAGCAACCATCTCA 3’
	R:5’GGGGACCACTTTGTACAAGAAAGCTGGGTTAGCTGCATAAGCGATAACGTAAAAG 3’
TET3 ΔGCCKP	F:5’ CCTGTTGAGTCCCCAACAGATTGCGGTTTTTCATATG 3’
	R:5’ TGGGGACTCAACAGGGCTAAGTCT 3’
TET4 ΔGCCKP	F:5’ CTGTTGAGTCCCCAACAGATTGTGGCTATACGTAC 3’
	R:5’ GTTGGGGACTCAACAGGAGAAAGATTTCT 3’
TET7 ΔGCCKP	F:5’ TCTTCAGTCTTCCAATGACTGTAACTTCACCTATGT 3’
	R:5’ GTCATTGGAAGACTGAAGAGCATTAAGATTAGATTTGT 3’
TET3C174A	F:5’ TGAGTCCGGTGCTTGCAAGCCACCAACAGAT 3’
	R:5’ CAAGCACCGGACTCAACAGGGCTAA 3’
TET3C175A	F:5’ TCCGGTTGTGCCAAGCCACCAACAGATTGC 3’
	R:5’ CTTGGCACAACCGGACTCAACAGG 3’
TET3C221A	F:5’ TTCTGCTAAAGCTGGTGTTCTTGGGAG 3’
	R:5’ CACCAGCTTTAGCAGAACTACACTGATAACAGAGCAT 3’
AttB2-RFP-TET3	F:5’ GGGGACAAGTTTGTACAAAAAAGCAGGCTTAATGAGAACAAGCAACCATCTCA 3’
	R:5’GGGGACCACTTTGTACAAGAAAGCTGGGTTTCAAAGATGGAAATGACTAGGATGTGAT 3’
Actin-A. thaliana	F:5’ ATGAAGATTAAGGTCGTGGCA 3’
	R: 5’ CCGAGTTTGAAGAGGCTAC 3’
Actin-N. benthamiana	F:5’TGCTGCTGTAACAAGATGGATGC 3’
	R: 5’ GAGATGGGGACAAAGGGGATT 3’
CMV_CP	F:5’ CGTTGCCGCTATCTCTGCTAT 3’
	R: 5’ GGATGCTGCATACTGACAAACC 3’
TET3-QRT_L1	F:5’ ACTGTATGGTGTGGAGCAAC 3’
TET3-QRT_R1	R: 5’ TCAAACTCCCAAGAACACCAG 3’
TET3-QRT_L2	F:5’ TAGCCCTGTTGAGTCCGGTT 3’
TET3-QRT_R2	R: 5’CTCTGGTCGTTGCTCCACAC 3’
TET4-QRT	F:5’TGGATTCCGGGAGGAGAAAT 3’
TET4-QRT_R1	R: 5’ TCAAGCTACCAAGAACACCG 3’
TET7-QRT	F:5’GTGAACCCGACTACTTGGAC 3’
TET7-QRT_R1	R: 5’ TCACAGTCGTAGCAGAGAGT 3’
Crispr-TET3	F:5’ GATTGTACTAGGTATAGCCACATA 3’
	R: 5’ AAACTATGTGGCTATACCTAGTAC 3’
tet3-T-DNA	F:5’ TGAACTAGGTTCCGATTCCAAC 3’
	R: 5’ GACCCATATGACGAGGGAGAC 3’
