# Supplementary material for: Arabidopsis Tetraspanins Facilitate Virus Infection via Membrane-Recognition GCCK/RP Motif and Cysteine Residues
Source: Front Plant Sci. 2022 Mar 3;13:805633. doi: 10.3389/fpls.2022.805633 (PMC8927881; doi:10.3389/fpls.2022.805633)
Supplement: Supplementary file 2 [file Table_2.XLSX]

## Sheet: Table S2. Cloning Strategy.
Table S2. Cloning Strategy.
Name	Promoter	Vector
35S:TET2-GFP	35S	PK7FWG2
35S:TET3-GFP	35S	PK7FWG2
35S:TET4-GFP	35S	PK7FWG2
35S:TET7-GFP	35S	PK7FWG2
35S:TET8-GFP	35S	PK7FWG2
35S:TET9-GFP	35S	PK7FWG2
35S:TET3-GFP Δmotif1	35S	PK7FWG2
35S:TET3-GFP Δmotif2	35S	PK7FWG2
35S:TET3-GFP Δmotif3	35S	PK7FWG2
35S:TET3-GFP ΔN terminal	35S	PK7FWG2
35S:TET3-GFP ΔH1	35S	PK7FWG2
35S:TET3-GFP ΔE1	35S	PK7FWG2
35S:TET3-GFP ΔH2	35S	PK7FWG2
35S:TET3-GFP ΔC1	35S	PK7FWG2
35S:TET3-GFP ΔH3	35S	PK7FWG2
35S:TET3-GFP ΔE2	35S	PK7FWG2
35S:TET3-GFP ΔH4	35S	PK7FWG2
35S:TET3-GFP ΔC terminal	35S	PK7FWG2
35S:TET3-GFP ΔGCCKP	35S	PK7FWG2
35S:TET4-GFP ΔGCCKP	35S	PK7FWG2
35S:TET7-GFP ΔGCCKP	35S	PK7FWG2
35S:TET3-GFPC174A	35S	PK7FWG2
35S:TET3-GFPC175A	35S	PK7FWG2
35S:TET3-GFPC221A	35S	PK7FWG2
35s:mRFP	35S	pB7WGR2
35s:mRFP-TET3	35S	pB7WGR2
35s:mRFP-TET3ΔGCCKP	35S	pB7WGR2
35s:mRFP-TET3C174AC175A	35S	pB7WGR2
35s:mRFP-TET3C221A	35S	pB7WGR2
